# On the evolutionary origins of equity

STÉPHANE DEBOVE<sup>1,2\*</sup>, NICOLAS BAUMARD<sup>2</sup>,  
JEAN-BAPTISTE ANDRÉ<sup>1,3</sup>

<sup>1</sup>Institut de Biologie de l'Ecole normale supérieure (IBENS), INSERM 1024, CNRS 8197,  
Ecole normale supérieure - PSL Research University, Paris, France.

<sup>2</sup>Institut Jean-Nicod (CNRS - EHESS - ENS), Département d'Etudes Cognitives, Ecole  
normale supérieure - PSL Research University, Paris, France.

<sup>3</sup> Institut des Sciences de l'Évolution, UMR 5554 - CNRS – Université Montpellier 2,  
Montpellier, France.

**\*Correspondence:** Stéphane DEBOVE, Institut de Biologie de l'Ecole normale supérieure,  
46 rue d'Ulm, 75005 Paris, FRANCE. Email address: [sd@stephanedebove.net](mailto:sd@stephanedebove.net)

12

## Abstract

13

14

15

16

17

18

19

20

21

22

23

24

25

26

Equity, defined as reward according to contribution, is considered a central aspect of human fairness in both philosophical debates and scientific research. Despite large amounts of research on the evolutionary origins of fairness, the evolutionary rationale behind equity is still unknown. Here, we investigate how equity can be understood in the context of the cooperative environment in which humans evolved. We model a population of individuals who cooperate to produce and divide a resource, and choose their cooperative partners based on how they are willing to divide the resource. Agent-based simulations, an analytical model, and extended simulations using neural networks provide converging evidence that equity is the best evolutionary strategy in such an environment: individuals maximize their fitness by dividing benefits in proportion to their own and their partners' relative contribution. The need to be chosen as a cooperative partner thus creates a selection pressure strong enough to explain the evolution of preferences for equity. We discuss the limitations of our model, the discrepancies between its predictions and empirical data, and how interindividual and intercultural variability fit within this framework.

27

28

Keywords: equity theory, fairness, inequity aversion, partner choice, merit, proportionality

## 1 Introduction

For centuries, philosophers have emphasized the important role of proportionality in human fairness. In the fourth century BC, Aristotle suggested an "equity formula" for fair distributions (Aristotle, 1999), mathematical equivalent of "reward according to contribution," whereby the ratios between the outputs  $O$  and inputs  $I$  of two persons  $A$  and  $B$  are made equal:  $\frac{O_A}{I_A} = \frac{O_B}{I_B}$ . This formula also captures the concept of "merit," the idea that people who work harder deserve more benefits (Adams, 1963; Konow, 2003; Skitka, 2012).

Psychological research on distributive justice, and on equity theory in particular, has offered extensive empirical support for Aristotle's claim (Adams, 1963; Homans, 1958; Walster et al., 1973; Mellers, 1982). Equity theory aims to predict the situations in which people will find that they are treated unfairly. A robust finding is that receiving more or less than what one deserves leads to distress and attempts to restore equity by increasing or decreasing one's contribution (Adams, 1963; Adams and Jacobsen, 1964). People prefer income distributions with strong work-salary correlations, prefer to give more to individuals whose input is more valuable, and favor meritocratic distributions as a whole in both micro- and macro-justice contexts (Baumard et al., 2013).

More recently, experiments with economics games have shown that participants consistently divide the product of cooperative interactions in proportion to each individual's talent, effort, and the resources invested in the interaction (Cappelen et al., 2010; Frohlich et al., 2004). Meritocratic distributions have been observed across many societies (Marshall et al., 1999), including hunter-gatherer societies (Gurven, 2004; Alvard, 2002; Liénard et al., 2013; Schäfer et al., 2015), and can be detected very early in human development (Kanngiesser et al., 2010; Baumard et al., 2012), suggesting that equity could be a universal and innate pattern in human psychology.

Preferences for equitable outcomes present the same evolutionary problem as preferences for fair outcomes in general: at least in the short term, those preferences are costly.

55 Although people react more to inequitable situations when they are disadvantageous than  
56 when they are advantageous, people still feel uncomfortable in unjustified advantageous  
57 situations (Austin and Walster, 1974; Fehr and Schmidt, 1999). Experiments even show  
58 that people are ready to incur costs and decrease their own payoff in order to achieve more  
59 equitable distributions (Dawes et al., 2007). How can natural selection account for the  
60 evolution of such costly preferences ?

61 Until now, little attention has been given to this question. There have been many  
62 theoretical studies on the evolution of fairness (Nowak et al., 2000; Gale et al., 1995;  
63 Page and Nowak, 2002; Barclay and Stoller, 2014; André and Baumard, 2011; Debove  
64 et al., 2015a), but all of them are concerned with explaining the evolution of fairness in  
65 the ultimatum game, an economic game where the fair division happens to be a division  
66 into two equal halves (Güth et al., 1982; Camerer, 2003). However, equal divisions are  
67 just a special case of the more general category of equitable divisions: that is, divisions  
68 proportional to contributions. As emphasized by equity theory, unequal divisions can be  
69 judged fair when they respect the partners' investment, talents, commitment, etc. In brief,  
70 although many models can explain the evolution of preferences for *equal* divisions, none  
71 of them is able to explain the evolution of preferences for *proportional* divisions. Here  
72 we aim to understand whether natural selection can lead to such proportional divisions of  
73 resources (including the particular case of equal divisions), in a scenario where partners  
74 can make differing contributions to a cooperative undertaking.

75 Partner choice has had an important role in the evolution of cooperation, as evidenced  
76 by both theoretical (Aktipis, 2004; Nesse, 2007; Aktipis, 2011; McNamara et al., 2008; Bar-  
77 clay, 2011) and empirical studies (Barclay, 2004; Barclay and Willer, 2007; Sylwester and  
78 Roberts, 2013, and see Barclay, 2013 for a review in humans). When people are in com-  
79 petition to be chosen as cooperative partners, experiments show that they increase their  
80 level of cooperation because they have a direct interest in doing so (Barclay, 2004, 2006).

81 Partner choice also has interesting consequences for the evolution of fairness. It leads to  
82 equal divisions of resources in theoretical and empirical settings (André and Baumard,  
83 2011; Debove et al., 2015b,a), because when individuals can choose whom to cooperate  
84 with then they are better off refusing divisions that do not compensate their opportunity  
85 costs. These results suggest the way through which partner choice could also explain the  
86 evolution of divisions proportional to contributions: if greater contributors have larger  
87 opportunity costs, they will choose partners who give them something at least equal to  
88 these opportunity costs. Nonetheless, this hypothesis has never been studied formally.

89 To summarize, preferences for equity are robust and widespread in humans, but we  
90 currently lack an evolutionary explanation for their costly existence. Here, we aim to  
91 put the partner choice mechanism to the test to see if it can explain such preferences. We  
92 develop models in which individuals put effort into the production of a collective good, and  
93 differ with regard to both the amount of effort they are willing to put in and the efficiency  
94 of their contribution to the production of the good. To determine the evolutionarily stable  
95 sharing strategy in this environment, we first analyzed an evolutionary model using agent-  
96 based simulations. We then developed a simple analytical model to better understand  
97 the simulations, and tested the robustness of our results by performing simulations with  
98 evolving neural networks as more realistic decision-making devices. The results provide  
99 converging support for the conclusion that when individuals can choose whom to cooperate  
100 with, equity emerges as the best strategy, and the offers that maximize fitness are those  
101 that are proportional to the individual's relative contribution to the production of the  
102 good.

## 103 2 Methods

104 We develop three complementary sets of simulations and an analytical model. For clarity,  
105 we present the first set of simulations in details before explaining how the other sets differ.

106 Source code for all simulations is available online.

## 107 **2.1 Simulations Set 1: two productivities**

### 108 **2.1.1 Individuals**

109 We consider a population of  $n$  individuals who will be given multiple opportunities to  
110 cooperate and produce resources during their life. Cooperation only takes place in dyadic  
111 interactions. We assume individuals are characterized by a "productivity", such that some  
112 individuals can produce more resources than others when they cooperate. Individuals can  
113 be of one of two productivities: low-productivity individuals can produce  $a$  resources when  
114 they cooperate, while high-productivity individuals can produce  $b$  resources ( $b > a$ ). This  
115 productivity is constant across the entire life of an individual but is not heritable: at birth,  
116 each individual is randomly attributed a level of productivity that is independent of his  
117 parent's. This condition is necessary so that there is always a diversity of productivities  
118 in the population at each generation.

119 To decide with whom they will cooperate and how to divide resources, we assume  
120 that each individual is characterized by eight genetic variables: four  $r_{ij}$  and four  $MAR_{ij}$   
121 variables, with  $i$  and  $j \in \{HP, LP\}$ , denoting an individual's productivity (HP = High-  
122 Productivity, LP = Low-Productivity).  $r_{ij}$  is the fraction of resources (between 0 and 1)  
123 that an individual of productivity  $i$  will give to an individual of productivity  $j$ . We call  
124 the  $r_{ij}$  variables the "reward" variables.  $MAR_{ij}$  is the minimum acceptable reward, the  
125 minimum fraction of resource that an individual of productivity  $i$  is ready to accept from  
126 an individual of productivity  $j$ .

### 127 **2.1.2 Social life**

128 Only two types of events can happen at any given time in our model: the encounter  
129 of two solitary individuals, or the split of two cooperating individuals. We model time

130 continuously. At each loop of the model, we (i) determine the time period until the next  
131 event (ii) determine whether this event is an encounter or a split, and (iii) execute the  
132 corresponding actions for each event, described below. This process is repeated until time  
133 has exceeded a constant  $L$ , which corresponds to the end of the life of all individuals (see  
134 section "reproduction" below).

135 After any event occurring at time  $t$  (or after the birth of individuals at  $t=0$ ), the time  
136 period until the next event is drawn in an exponential distribution of parameter

$$137 \quad \lambda(t) = (C(t) * \frac{\tau}{2}) + S(t) * \beta$$

138 with  $C(t)$  the number of cooperating individuals at time  $t$ ,  $S(t)$  the number of solitary  
139 individuals at time  $t$ ,  $\beta$  a constant encounter rate and  $\tau$  a constant split rate.

140 The probability  $p(t)$  that this event is an encounter is then given by

$$141 \quad p(t) = S(t) * \frac{\beta}{\lambda(t)}$$

142 Conversely,  $1 - p(t)$  is the probability that this event is a split.

143 Depending on whether the event is an encounter or a split, two scenarios unfold:

144 1/ If the event is an encounter, two solitary individuals are randomly drawn from the  
145 population and offered an opportunity to cooperate to produce resources. To this end,  
146 one of the two individuals is randomly selected to unilaterally decide how to divide the  
147 resources through her  $r_{ij}$  reward variable. We call this individual the "partner". However,  
148 before cooperation effectively starts, the partner must be accepted by the second individ-  
149 ual. We call the second individual the "decision maker". The decision maker makes her  
150 decision based on her partner's reputation. For simplicity, we do not model the formation  
151 of this reputation. We simply assume that the decision maker knows her partner's reward  
152 value  $r_{ij}$ . For instance, a HP partner  $A$  has a reputation of  $r_{A_{HPLP}}$  with a LP decision  
153 maker  $B$ . The LP decision maker will then compare the value of  $r_{A_{HPLP}}$  to her own

154  $\text{MAR}_{BLPHP}$ , and if  $r_{AHPLP} \geq \text{MAR}_{BLPHP}$ , the partner will be accepted and cooperation  
155 will start. From this point on until the interaction stops, the two individuals produce, at  
156 each unit of time, an amount of resources that is equal to the sum of their respective pro-  
157 ductivities, from which the decision maker receives a fraction  $r_{AHPLP}$ . Conversely, if the  
158 partner's reputation is not good enough for the decision maker ( $r_{AHPLP} < \text{MAR}_{BLPHP}$ ),  
159 the two individuals do not cooperate together and go back to the pool of solitary individ-  
160 uals without receiving any resources.

161 2/ If the event is a split, a pair of cooperating individuals is randomly chosen to split,  
162 and the two individuals go back to the pool of solitary individuals.

### 163 **2.1.3 The cost of partner choice.**

164 The cost of partner choice is implicit in our model. It is a consequence of the time it  
165 takes to find a partner. Hence, the cost and benefit of being choosy are not controlled by  
166 explicit parameters, but by two parameters that characterize the "fluidity" of the social  
167 market: the "encounter rate"  $\beta$ , and the "split rate"  $\tau$ . When  $\frac{\beta}{\tau}$  is large, interactions last  
168 a long time (low split rate  $\tau$ ) but finding a novel partner is fast (high encounter rate  $\beta$ ),  
169 and individuals thus should be picky about which partners they accept. This is a situation  
170 where partner choice is not costly. On the contrary, when  $\frac{\beta}{\tau}$  is low, interactions are brief  
171 but finding a novel partner takes time, and individuals should thus accept almost any  
172 partner. Partner choice is then costly.

### 173 **2.1.4 Reproduction**

174 We model a Wright-Fisher population with non-overlapping generations: when the lifespan  
175  $L$  has been reached, all individuals reproduce and die at the same time. The number of  
176 offsprings produced by a focal individual is given by:

$$177 \text{ offsprings} = \text{round}\left(\frac{f * z}{\bar{z}}\right)$$



178 with  $z$  the focal individual's amount of resources accumulated throughout her life,  $\bar{z}$   
 179 the average amount of resources accumulated in the population, and  $f$  a constant multi-  
 180 plication factor. Offsprings receive the four  $r_{ij}$  and four  $MAR_{ij}$  traits from their parents,  
 181 with a probability  $m$  of mutation on each trait. Mutations are drawn from a normal dis-  
 182 tribution centered around the trait value with standard deviation  $d$ , and constrained in  
 183 the interval  $[0,1]$ . After mutations take place,  $n$  individuals are randomly drawn from the  
 184 pool of offsprings to constitute the population for the next generation.

185 Table 1 summarizes the model's parameters. To obtain the results presented below, we  
 186 initialize all simulations with a population of stingy and undemanding individuals, who  
 187 do not share when they play the role of partner and accept any partner when they play  
 188 the role of decision maker ( $r_{ij} = 0$ ,  $MAR_{ij} = 0$ ). We then test our hypothesis that  
 189 partner choice can lead to equitable divisions by observing how rewards and MARs evolve  
 190 across generations, in two conditions: when partner choice is costly (low  $\frac{\beta}{\tau}$ ), and when  
 191 partner choice is not costly (large  $\frac{\beta}{\tau}$ ). In particular, we will observe the rewards given by  
 192 LP individuals to HP individuals at the equilibrium when partner choice is not costly, to  
 193 detect whether they show the same pattern of proportionality between contribution and  
 194 reward than the one observed in the empirical human data.

| Parameter name | Description                                                                                 | Value used to obtain reported results |
|----------------|---------------------------------------------------------------------------------------------|---------------------------------------|
| n              | number of individuals                                                                       | 500                                   |
| a              | productivity of low-productivity individuals                                                | 1                                     |
| b              | productivity of high-productivity individuals                                               | 2                                     |
| r              | reward, fraction of resources that an individual agrees to give to another                  | evolving (starts at 0)                |
| MAR            | minimum accepted reward, minimum fraction of resource that an individual is ready to accept | evolving (starts at 0)                |
| $\beta$        | encounter rate                                                                              | from 0.0001 to 1                      |
| $\tau$         | split rate                                                                                  | 0.01                                  |
| L              | lifespan                                                                                    | 500                                   |
| m              | mutation rate                                                                               | 0.002                                 |
| d              | mutation standard deviation                                                                 | 0.02                                  |

Table 1: Parameters of the model, and values used to obtain the figures presented in the main text. Deviations from these values do not change the core results.

## 195 **2.2 Analytical model.**

196 We develop an analytical model that incorporates all of the features of the simulations pre-  
197 sented above, but with one simplification: we assume that the total number of interactions  
198 accepted per unit of time is the same for each individual. With this assumption, rejecting  
199 an opportunity to cooperate does not compromise the chances of cooperating later, but  
200 on the contrary grants new opportunities. This situation is analogous to the condition  
201 where  $\frac{\beta}{\tau}$  tends towards infinity in the simulations: social opportunities are plentiful at the  
202 scale of the length of interactions. The analysis of this model is presented in details in SM  
203 section B.

## 204 **2.3 Simulations Set 2: a continuum of productivities**

205 Introducing a continuum of productivities is necessary to get closer to biological reality.  
206 Rather than having only two productivities  $a$  and  $b$  in our population, we assume in  
207 Simulations Set 2 that the productivity of an individual at birth is sampled from a uniform  
208 distribution between  $a$  and  $b$ . In this situation, individuals never interact with a partner of  
209 the exact same productivity. This constitutes a challenge for modeling in that individuals  
210 would need to be equipped with an infinity of  $r_{ij}$  and  $MAR_{ij}$  traits to react to the infinity  
211 of possible contributions by their partner (Gavrilets and Scheiner, 1993).

212 To solve this problem, we do not characterize anymore individuals with  $r_{ij}$  and  $MAR_{ij}$   
213 traits, but instead endow them with two three-layer feedforward neural networks (one  
214 network to produce the rewards, and another one to produce the MARs). Both neural  
215 networks have the same structure: two input neurons, five hidden neurons, and a single  
216 output neuron. The first neural network is used when playing the role of partner: it senses  
217 an individual's own productivity and that of her decision maker, and produces the reward  
218 as output. The second network is used when playing the role of decision maker: it senses an  
219 individual's own productivity and that of her partner, and produces the MAR as output.

220 Each network has its own set of synaptic weights (see Fig. 3A and SM section A.2), that  
221 are transmitted genetically. Because evolution now operates on these weights, and not on  
222 rewards or MARRs directly, individuals can now evolve a reaction norm. They can evolve a  
223 function that produces outputs even from inputs they have never encountered before (i.e.,  
224 individuals of new productivities). This property of neural networks is important in our  
225 case, because equity is precisely a relationship between two quantities, contribution and  
226 reward. Seeing whether natural selection will be able to recreate the same relationship of  
227 proportionality between contribution and reward using simple neural networks is thus of  
228 great interest. All other methodological details for Simulations Set 2 are the same as in  
229 Simulations Set 1.

## 230 **2.4 Simulations Set 3**

231 As a final test of the robustness of our model, we test whether natural selection also  
232 favors divisions proportional to contributions when contribution is measured in terms of  
233 time invested into cooperation (instead of productivity). We present the details of these  
234 simulations and its results in SM section A.1.

## 235 **3 Results**

236 We first present the results for Simulations Set 1. Parameter values used to obtain the  
237 figures are summarized in Table 1. Reasonable deviations from these values do not alter  
238 the results. Moreover, analytical results confirm the results of Simulation Set 1 (see SM  
239 section B).

240 We present the case where high-productivity individuals are able to produce twice as  
241 much resources as low-productivity individuals ( $a = 1, b = 2$ ). Figure 1 shows the evo-  
242 lution of rewards  $r$  accepted by decision makers across generations. Rewards increase  
243 in all possible combinations of productivities, when partner choice is not costly (circle

244 markers). If we focus on rewards accepted by high-productivity decision makers with low-  
245 productivity partners (Fig 1, upper-right panel), simulations show that at the evolutionary  
246 equilibrium, low-productivity partners have to give exactly 66% of the total resource pro-  
247 duced to their high-productivity decision makers. This reward is exactly proportional to  
248 the relative contribution of each individual, as high-productivity individuals produce 66%  
249 of the total shared resource when  $a = 1$  and  $b = 2$ . Similarly, high-productivity partners  
250 give only 33% to low-productivity decision makers, a reward which low-productivity deci-  
251 sion makers accept, as it corresponds to their relative contribution (Fig 1, lower-left panel,  
252 circle markers). Finally, both high-productivity and low-productivity individuals give each  
253 other exactly 50% of the total resource when they meet as a pair, reflecting the fact that  
254 proportionality means equal division when contributions are equal (Fig 1, upper-left and  
255 lower-right panels). This pattern of divisions is confirmed by the analytical model (dashed  
256 lines in Fig 1, and see SM section B), and divisions proportional to contribution also  
257 evolve when contribution is measured in terms of time invested into cooperation instead  
258 of productivity (see SM section A.1).

259 By comparing simulations with a low and a high  $\frac{\beta}{\tau}$  ratio, Figure 1 also emphasizes  
260 the critical importance of partner choice for proportional rewards to evolve. When we  
261 decrease the  $\frac{\beta}{\tau}$  ratio, individuals spend more time looking for new partners and thus the  
262 cost of changing partners is increased. In this situation, rewards remain very low over gen-  
263 erations and never rise towards proportionality, regardless of differences in productivity  
264 (Fig 1, triangle markers). For instance, even if low-productivity partners produce less than  
265 half of the resources when they cooperate with high-productivity decision makers, they  
266 keep most of the resources for themselves when partner choice is costly. Figure 2 shows  
267 the distribution of rewards given by low-productivity individuals to high-productivity in-  
268 dividuals at the end of an 8,000-generation simulation, for different values of the  $\frac{\beta}{\tau}$  ratio.  
269 Proportional rewards of 66% can only evolve when  $\frac{\beta}{\tau}$  is large, showing again that without  
270 partner choice, proportionality cannot evolve.

271 The results of Simulation Set 2 confirm this pattern. With a continuum of produc-  
272 tivities in the population (between 1 and 2), rewards still respect proportionality at the  
273 evolutionary equilibrium. Each individual who enters an interaction is rewarded with an  
274 amount of resources exactly equal to her productivity (Fig 3B). As explained in the meth-  
275 ods section, neural networks have two inputs: an individual's own contribution and her  
276 partner's (or decision maker's) contribution. It is thus possible to represent the output of  
277 a network on a 3D plot, shown in Fig 3C. To plot this figure, we extracted the synaptic  
278 weights of the neural networks producing MARs for 15,000 individuals, at the last gen-  
279 eration of 30 different simulation runs. We averaged the value of the networks' outputs  
280 over those 15,000 individuals. Fig 3C shows that the networks evolved to produce MARs  
281 that are proportional to their bearer's relative contribution (Fig 3C and D, and see SM  
282 section C.2). The higher the decision maker's productivity, and the lower the partner's  
283 productivity, the more demanding the decision maker becomes.

## 284 4 Discussion

285 We modelled a population of individuals choosing each other for cooperation. When differ-  
286 ent contributions to cooperation are made, resource divisions proportional to contributions  
287 evolve. Individuals producing more resources or investing more time into cooperation re-  
288 ceive more resources than individuals producing or investing less. Asking for divisions that  
289 match one's own contribution, and proposing such divisions to others, constitutes the best  
290 strategy when partner choice is possible. In other terms, a preference for equity maximizes  
291 fitness in an environment where individuals can choose their cooperative partners.

292 It is important to note that our results cannot be summarized as "a preference for  
293 equity helps individuals to be chosen as a partner" or "a preference for equity helps avoid  
294 interactions with selfish partners." This is only half of the story. If the point were only to be  
295 chosen as a partner, the best strategy would be to be as generous as possible, an outcome

296 which is sometimes observed in models inspired by competitive altruism theories (Roberts,  
297 1998). The point here is rather to be chosen as a partner while at the same time avoiding  
298 exploitation by being over-generous. Our model clearly shows that the best strategy to  
299 solve this problem is to give proportionally to the other's contribution—not less, but also  
300 not more. Equity is the result of a trade-off between two evolutionary pressures which  
301 work in opposite directions: the pressure to keep being chosen, but also the pressure to  
302 choose wisely.

303 This last point is better understood by looking at the precise mechanism through  
304 which proportionality evolves. The key factor determining divisions of resources at the  
305 evolutionary equilibrium are the opportunity costs of each individual. Opportunity costs  
306 represent the benefits an individual renounces to when she makes a choice. From an evo-  
307 lutionary point of view, it is trivial that an individual will want to make the best choices  
308 possible to minimize her opportunity costs. Hence, the best strategy to keep being chosen  
309 as a cooperative partner is to compensate others' opportunity costs: when individual A  
310 agrees to interact with individual B, individual B should give A something equal to A's  
311 opportunity costs at the time of making the decision (and vice versa). This is exactly why  
312 high-productivity individuals get more in our model: high-productivity individuals have  
313 larger opportunity costs than low-productivity individuals. Suppose that low-productivity  
314 individuals produce 1 unit of a resource whereas high-productivity individuals produce 2.  
315 High-productivity individuals thus have the possibility to produce 4 resources when they  
316 interact with other high-productivity individuals, leaving them with 2 resources on av-  
317 erage (see exactly why in SM section C.1). 2 resources is thus the opportunity cost of  
318 high-productivity individuals when they agree to cooperate with low-productivity indi-  
319 viduals. Thus, if low-productivity individuals want to be good partners, they will have  
320 to compensate high-productivity individuals' opportunity costs and give them exactly 2  
321 resources (out of 3 produced), which will result in a proportional offer of 66%. But low-  
322 productivity individuals should not give more neither, because they also have access to

323 interactions in which they could gain 1 unit on average (when they cooperate with other  
324 low-productivity individuals). In other words, low-productivity individuals have oppor-  
325 tunity costs of 1, and should thus not accept divisions leaving them with less than 1.  
326 Our current model and previous papers on the subject (André and Baumard, 2011; De-  
327 bove et al., 2015b,a) push forward the idea that the sense of fairness is a psychological  
328 mechanism evolved to compensate others' opportunity costs and minimize one's own op-  
329 portunity costs. This characterization only comes from models investigating fairness in  
330 distributive situations though, so it would be interesting to see if it holds in more diverse,  
331 non-distributive situations.

332 Our model has several limitations, which need to be acknowledged. First, while we  
333 suppose that individuals choose each other based on their reputation, we do not explicitly  
334 model the formation of this reputation. Individuals automatically know the reputation  
335 of others and this reputation is reliable. It could be interesting to relax this assumption,  
336 especially because reputation formation (through communication for instance) might be  
337 an important point that distinguishes humans from non-human primates. Second, the  
338 population we model does not match the hunter-gatherer population in the sense that it  
339 is not structured. This is important because a structure, such as camps or family units,  
340 could potentially affect opportunities to choose partners. Finally, it might be interesting to  
341 model the evolution of fairness in a wider range of cooperative interactions than we have  
342 considered here (outside distributive situations for instance). All of these assumptions  
343 should be relaxed in future studies.

344 Partner choice is not the only evolutionary mechanism postulated to lead to the evo-  
345 lution of fairness in the literature. Some authors have argued that fairness could be  
346 explained by empathy (Page and Nowak, 2002), spite (Huck and Oechssler, 1999; Barclay  
347 and Stoller, 2014; Forber and Smead, 2014), "noisy" processes such as drift or learning  
348 mistakes (Gale et al., 1995; Rand et al., 2013), the existence of a spatial population struc-

349 ture (Page et al., 2000; Killingback and Studer, 2001), or alternating offers (Rubinstein,  
350 1982; Hoel, 1987). But as we explained in the introduction, all of these models equate  
351 fairness with equality, and it is thus unknown whether they can explain a more general  
352 case. Testing whether those models pass the "equity test" will be an excellent way to  
353 compare and decide between these models, a necessary undertaking that has been largely  
354 neglected. The extensive literature on "bargaining" in economics (Binmore, 1986; Bin-  
355 more, 1998; Alexander, 2000) was also more focused on the case in which players are in a  
356 symmetric position, and usually did not investigate proportional bargaining solutions. An  
357 exception is the work by Kalai (1977) (although Binmore, 2005 also mentions the problem  
358 p. 31), who shows that individuals will compromise in different bargaining situations so as  
359 to keep their proportions of utility gains fixed. But, as Kalai recognizes it himself (P11),  
360 "a more difficult problem is to find what these proportions should be". This is precisely  
361 where we make a contribution: we show that when individuals evolve in biological mar-  
362 kets, these proportions are automatically determined by the other encounters individuals  
363 can make. In other words, one could rephrase our model as showing that individuals can  
364 bargain based on their outside options (or opportunity costs), but contrarily to what has  
365 been done before, we do not fix exogenously those outside options. Rather, outside options  
366 emerge endogenously from all the encounters individuals can make in the population.

367 Talking about bargaining theory suggests alternative interpretations of our model. It  
368 might be argued that human fairness is the result of bargaining at the proximal level, the  
369 result of rational cognitive processes. We argue instead that the "bargaining" already took  
370 place at the ultimate level by means of natural selection, and that the result of this bar-  
371 gaining is the existence of a genuine sense of fairness which "automatically" makes humans  
372 prefer equitable strategies. This hypothesis does not exclude the possibility that humans  
373 are also capable of consciously bargaining based on their opportunity costs, but this be-  
374 havior would not be the product of an evolved sense of fairness. While our model bears a  
375 great resemblance to historical market models (Osborne and Rubinstein, 1990) and other



376 models in economics in which fair outcomes have sometimes been observed (Rubinstein,  
377 1982; Binmore, 2005), we emphasize that the markets we model are ultimate biological  
378 markets (Noë and Hammerstein, 1994; Noë et al., 2001). This is not just an empty ter-  
379 minological variation: locating markets at the ultimate level has important implications  
380 for our understanding of the psychological mechanisms underlying fairness. Among other  
381 things, it allows us to understand why fairness does not seem to be based on self-interest at  
382 the psychological level even if fairness evolved for self-interested reasons (Baumard et al.,  
383 2013; Trivers, 1971).

384 Another alternative interpretation of our model remains. One could agree that fairness  
385 judgments are based on simple automatic rules rather than complex conscious calculations,  
386 but argue that those rules could have evolved culturally rather than biologically. This is  
387 not an issue that can be settled theoretically, as the same models can always be interpreted  
388 as instances of biological or cultural evolution. To date, we definitely lack empirical data to  
389 answer this question with certainty, but the idea of a biologically evolved sense of fairness  
390 is not made absurd by the existing data. As early as the age of 12 months, children react  
391 to inequity (Schmidt and Sommerville, 2011; Geraci and Surian, 2011; Sloane et al., 2012),  
392 equity has been identified in many cultures around the world (Marshall et al., 1999; Gurven,  
393 2004), and children reject conventional rules when they violate principles of fairness (Turiel,  
394 2002). We do not take experiments on inequity aversion in non-human primates as evidence  
395 for a biologically evolved sense of fairness, as the negative reactions to inequity observed so  
396 far can still be interpreted in more parsimonious ways (see Bräuer and Hanus (2012) for a  
397 review and Amici et al. (2014) for methodological issues). Nonetheless, those experiments  
398 remind us that many researchers expect that prosocial behaviors traditionally associated  
399 with the existence of human institutions, religions, or cultural artefacts can also evolve  
400 biologically. In fact, Robert Trivers himself recognized that the most important implication  
401 of his seminal paper on the evolution of reciprocity (Trivers, 1971) was that "it laid the  
402 foundation for understanding how a sense of justice evolved" (Trivers, 2006).

403           The existence of intercultural and interindividual variations in fairness judgements (Cappelen et al., 2010; Schäfer et al., 2015) is sometimes taken as evidence against their biological origin. This criticism is generally ill-founded, as evolutionary explanations have no particular difficulty accommodating variation (Barkow et al., 1992). In the case of fairness, it is important to remember that what our model predicts is not the evolution of a fixed judgement but the evolution of an algorithm, an information-processing mechanism (Barkow et al., 1992). This is particularly evident in our extended simulations where the evolving unit is a neural network, precisely a special type of algorithm. This algorithm works on inputs (contributions) to produce outputs (divisions of resources), and here lies an important source of variability, because inputs can vary across cultures and individuals while the algorithm remains the same. For instance, measurements of contributions are affected by beliefs ("How long do I think it takes to harvest this quantity of food?"). If contribution was the only input in our model, in real-life more parameters can affect the algorithm's inputs, such as general knowledge ("Is this person not productive because she is sick?") or individual interpretations of the situation ("Are we engaged in a communal interaction? A joint venture? A market exchange?"). This last point could explain why even in carefully controlled environments, where there is little ambiguity about the source of inequalities, there is still heterogeneity in fair behaviors, with some people behaving as egalitarians, others as meritocrats, and others still as libertarians (Cappelen et al., 2007, 2010).

423           In fact, while interindividual and intercultural variations have crystallized the debate, intra-individual variation can also be observed even in Western countries. In some situations we behave as meritocrats, requiring pay for each additional hour of presence at work (Adams, 1963; Adams and Jacobsen, 1964), whereas the next day on a camping trip with strangers we behave more like egalitarians, without constant monitoring and book-keeping of our contributions and those of others (Cohen, 2009). Neither our brain (the algorithm) nor our culture has changed in the meantime. What has changed is the way

430 we interpret the situation (part of the input to the algorithm). This idea needs to be de-  
431 veloped more formally, and we do not suggest that it is the only way to explain variation,  
432 but it may constitute a fruitful avenue of research.

433 Another interesting question is the prevalence of equity in traditional societies. We  
434 have mentioned anthropological records of distributions according to effort (Gurven, 2004;  
435 Kaplan and Gurven, 2005), but it is also well known that hunter-gatherers transfer meat  
436 in a way that not does not seem to respect equity. This type of interaction has been  
437 called "generalized reciprocity" by Sahlins (1972) and also seems to match Fiske (1992)'s  
438 notion of a "communal sharing" system. There are at least two mutually compatible  
439 ways to reconcile this observation with the predictions of our model. The first is to  
440 recognize that equity can be limited by other factors, for instance diminishing returns  
441 to consumption (Nettle et al., 2011). People could stop caring about equity when they  
442 become satiated or when they receive little additional value from consuming one more unit  
443 of benefits. The second is to consider that even in generalized reciprocity good hunters  
444 are rewarded with more benefits, but those benefits are delayed. This hypothesis has  
445 received support recently from findings showing that generous hunters and hard workers  
446 are central in the social networks of small-scale societies (Lyle and Smith, 2014; Bird  
447 and Power, 2015). In this last perspective, our model should not be taken at face value  
448 as predicting the evolution of strict equity with immediate input/output matching, but  
449 more generally as input/output matching over a long time and across different cooperative  
450 activities ("generalized equity").

451 We conclude by noting that proportionality is important in distributive justice but is  
452 also a cornerstone of institutional justice, wherein offenders are punished in proportion  
453 to the severity of their crimes (Hoebel, 1954; Robinson and Kurzban, 2007). It is also  
454 central to the morality of many religions, in which rewards and punishments are made  
455 proportional to good and bad deeds by supernatural entities or forces (Baumard and

456 Boyer, 2013). Although this is only speculation at present, our results may thus also  
457 explain why historically recent cultural domains such as penal justice and moral religions  
458 insist on the principle of proportionality: retributive punishment and supernatural justice  
459 may reflect our evolved desire for proportionality.

# Supplementary Material

## A Simulation procedures

### A.1 Simulations Set 3: contribution through time invested

#### A.1.1 Methods

Having a higher productivity is only one way to contribute more to a cooperative interaction. Another natural way is to spend more time to amass resources. To test the robustness of our partner choice mechanism, we thus created a third set of simulations in which there are no more differences of productivity between individuals, but one of the two individuals in a cooperating dyad has to invest  $m$  times more time than her partner. We thus model the possibility that there is a cooperative role more time-consuming than the other. In practice, we model this by randomly attributing a “high investment of time” role to the partner or the decision maker when an encounter takes place. The decision maker then decides whether or not she wants to cooperate with her partner based on her partner’s reputation for a given level of investment into cooperation. Each individual is thus characterized by 4 genetic variables, two  $r_{kl}$  and two  $MAR_{kl}$ , with  $k$  and  $l \in \{H, L\}$ , denoting an individual’s time investment (H = High, L = Low). If the partner is accepted, individuals share a constant resource of size 1 at each unit of time, and the end of the interaction is determined in the same way than in Simulations Set 1, through a constant split rate  $\tau$ . When a split happens though, the individual who needs to invest more time is prevented to encounter new individuals for a length of time equal to  $(m - 1) * (\text{the length of the interaction})$ . Because this individual is prevented to encounter other individuals during this period, one can interpret this period as a period in which this individual is still investing time into the previous interaction.

483 All other methodological details for Simulations Set 3 are the same as in Simulations  
484 Set 1. In particular, we start from a population of individuals giving zero reward even  
485 when they invest less time into cooperation, and observe what will be the relationship  
486 between contribution (time invested) and rewards at the evolutionary equilibrium.

### 487 **A.1.2 Results**

488 Simulations Set 3 show that proportional rewards also evolve when individuals differ not  
489 by their productivity but by the time they invest in cooperation (Fig 4). Setting  $m = 2$ ,  
490 one individual of the pair has to invest twice as much time as the other. When the decision  
491 maker invests twice as much time, the partner agrees to reward him with 66% of the total  
492 resource at the evolutionary equilibrium, when partner choice is not costly. Conversely,  
493 when decision makers invest half as much time as their partner, they accept rewards of 33%  
494 only, showing that the fitness-maximizing strategy in this situation is to accept rewards  
495 proportional to each partner's relative time investment.

## 496 **A.2 Functioning of the neural networks**

497 Each neuron in the networks computes an output signal of value

$$output = \frac{1}{1 + e^{(-input)}} \quad (1)$$

498 with *input* being a linear combination of the outputs of the neurons of the previous  
499 layer and the related synaptic weights. This is a function routinely used in evolutionary  
500 robotics (Nolfi and Floreano, 2000). Synaptic weights can take values from the interval  
501  $[-5, 5]$ , and are randomly drawn from a uniform law covering this interval at the start of  
502 the simulation.

503 When applying mutations, to avoid networks to fall in suboptimal local maxima, mu-  
504 tations on the synaptic weights are drawn from a uniform distribution with a small proba-

505 bility 0.05 ; otherwise they are drawn in a normal distribution centered around the synaptic  
506 weight's value.

## 507 **B Analytical model.**

508 We developed an analytical model to model the situation where individuals differ by their  
509 productivity (but not effort), and where only two productivities coexist in the population.  
510 The analytical model incorporates all of the features of the simulations, but with one sim-  
511 plification: we assume that the total number of interactions accepted per unit of time is  
512 the same for each individual. With this assumption, rejecting an opportunity to cooperate  
513 does not compromise the chances of cooperating later, but on the contrary grants new op-  
514 portunities. This situation is analogous to the condition where  $\frac{\beta}{\tau}$  tends towards infinity in  
515 the simulations: social opportunities are plentiful at the scale of the length of interactions.  
516 When individuals reject an interaction, however, they are forced to postpone their social  
517 interaction to a later encounter. We assume that this entails an explicit cost expressed  
518 as a discounting factor  $\delta$  ( $0 \leq \delta < 1$ ). If we call the average payoff of an individual of  
519 productivity  $i$   $G_i$ , then  $\delta G_i$  will be the average expected payoff in the next interaction  
520 after rejecting an offer. When  $\delta$  equals 1, refusing an interaction carries no cost; when  $\delta$   
521 equals 0, refusing an interaction will result in zero payoff from the next interaction. In  
522 practice, we will neglect the case where  $\delta$  equals 1, as it leads to artefactual results (see  
523 below).

524 The assumption that only partners can decide of the division in our model is necessary  
525 so that the evolution of fairness is not explained trivially. When only one individual can  
526 decide, natural selection favors selfishness (André and Baumard, 2011). This is easy to  
527 understand. On the one hand, whatever reward a partner suggests, accepting it brings  
528 a greater gain than rejecting it for the decision maker. Therefore, in all cases, natural  
529 selection favors indiscriminate partners, with decision makers taking whatever benefits

530 are made available to them. On the other hand, and as a result, selection favors stingy  
531 partners, offering the minimal possible amount. Because decision makers are in such an  
532 inferior bargaining position, in the following analysis we will focus on decision makers'—  
533 and not partners'—payoffs. A decision maker receiving a large share of the resource is a  
534 strong indication that there are evolutionary forces at work against the expected partners'  
535 selfishness.

536 All our analyses assume that (i) individuals enter the population at a constant rate,  
537 (ii) evolution is slow compared to an individual's lifespan (and thus ) (iii) mutations are  
538 rare, and that (iv) there is no recombination between genetic traits ( $p_{ij}$  and  $q_{ij}$ ). As a  
539 consequence of (i) and (ii), the composition of the population does not change during an  
540 individual's life. As a consequence of (iii) and (iv), at any evolutionary equilibrium, all the  
541 strategies present in the population must reach the same payoff for individuals of a given  
542 strength (only a high mutation rate or recombination rate could continuously re-introduce  
543 maladaptive strategies in the population, yielding a variance of payoffs at each generation).

544 Here we ask the same question answered in the main paper through simulations: how  
545 will the behavioural traits  $r_{ij}$  and  $MAR_{ij}$  ( $i$  and  $j \in \{HP, LP\}$ ) evolve in an environment  
546 where LP and HP individuals coexist and share resources? As a reminder,  $MAR_{LPHP}$   
547 reads as "the minimum reward that a LP individual will accept from a HP individual,"  
548 and  $r_{HPLP}$  as "the reward a HP individual will give to a LP individual."

549 Following the precise evolutionary dynamics of the system to answer this question  
550 is quite a complex challenge, in particular due to epistasis phenomena. The low fitness  
551 benefits brought by a reward  $r$  can be compensated by high benefits from an acceptance  
552 threshold MAR, or small benefits obtained in interactions with individuals of one pro-  
553 ductivity could be compensated by high benefits received in interactions with the other  
554 productivity, generating linkage disequilibrium (McNamara et al., 2008). But as in (André  
555 and Baumard, 2011), it is easier to derive simple conditions on the payoff an individual



556 would or would not have an interest in accepting at the evolutionary equilibrium.

## 557 B.1 Solving the system

558 The reasoning is more normative than descriptive, as we consider a situation in which the  
559 equilibrium has already been reached, and derive constraints on the values of traits that  
560 individuals should display at the equilibrium. To derive the payoff a LP individual should  
561 receive from a HP individual at the evolutionary equilibrium, we need to consider four  
562 arguments:

- 563 **1. All individuals with the same productivity must gain the same payoff.** At  
564 the equilibrium, all HP individuals should gain the same payoff  $G_{HP}$  per interaction  
565 (otherwise it wouldn't be an equilibrium), and the same is true for LP individuals.  
566 We thus only have two average payoffs in the population at the equilibrium. The  
567 average payoff of a HP individual is labeled  $G_{HP}$ , and that of a LP individual is  
568 written  $G_{LP}$ .
- 569 **2. Every individual of productivity  $i$  accepts exactly  $\delta G_i$ ,** with  $i \in \{HP, LP\}$ . If  
570 an individual's average payoff is  $G_i$ , his expected payoff in the next interaction (if the  
571 current interaction is refused) will be  $\delta G_i$ . As a consequence, a decision maker should  
572 never refuse a reward that is above the corresponding  $\delta G_i$ , but should always refuse  
573 rewards that are below this level. At the equilibrium, because rewards from partners  
574 should evolve toward the minimum that decision makers will accept, individuals will  
575 always demand and accept exactly  $\delta G_i$ , no matter who they are interacting with  
576 (regardless of their partner's productivity). We thus have:

$$\left\{ \begin{array}{l} \text{MAR}_{HPHP} = \delta G_{HP} \\ \text{MAR}_{HPLP} = \delta G_{HP} \\ \text{MAR}_{LPLP} = \delta G_{LP} \\ \text{MAR}_{LPHP} = \delta G_{LP} \end{array} \right. \quad (2)$$

577 **3. Partners give their decision makers what they want at the evolutionary**  
578 **equilibrium, as long as  $\frac{a}{b} > \frac{\delta(x-1)}{\delta x-2}$ .**

579 Knowing (1) and (2), it can be shown that partners are always better off giving their  
580 decision makers what they "ask for" ( $\delta G_i$ ) at the evolutionary equilibrium, as long  
581 as  $\delta < 1$ . The reasoning is as follows.

582 Suppose that at the evolutionary equilibrium, all LP individuals refuse to give HP  
583 individuals what they ask for, namely  $\delta G_{HP}$  (but all other demands are satisfied).  
584 The average social payoff of a LP individual in this population is then

$$G_{LP} = (1 - x) \left( \frac{\delta G_{LP}}{2} + \frac{\delta G_{LP}}{2} \right) + \frac{1}{2} x (a + a) \quad (3)$$

585 with  $x$  the proportion of LP individuals in the population and  $a$  the productivity of  
586 LP individuals.  $G_{LP}$  can be decomposed into three terms: an average payoff obtained  
587 in interactions with other LP individuals  $\frac{1}{2}(a + a)$ , an average payoff obtained in  
588 interactions with HP individuals when HP individuals play the role of decision makers  
589 (in this case, under our hypothesis the reward will be rejected and the LP individual's  
590 payoff will be discounted by  $\delta$ ), and, finally, an average payoff obtained in interactions  
591 with HP individuals when HP individuals are partners (the LP individual's MAR is  
592 met, so they gain  $\delta G_{LP}$ ).

593 Similarly, the payoff of a HP individual in this population is

$$G_{HP} = x \left( \frac{\delta G_{HP}}{2} + \frac{1}{2} (-\delta G_{LP} + b + a) \right) + \frac{1}{2} (1 - x) (b + b) \quad (4)$$

594 with  $b$  the productivity of HP individuals. Solving the system composed of equa-  
595 tions (3) and (4) gives us an expression for  $G_{HP}$  and  $G_{LP}$ . The question we need  
596 to answer now is the following: what would happen if, in such a population, a mu-  
597 tant LP individual decided to accept to give HP individuals what they want? Upon

598 meeting a HP individual and being assigned the role of partner, this mutant would  
599 gain  $a + b - \delta G_{HP}$  (the resource to be shared minus the demand of a HP individual)  
600 instead of just  $\delta G_{LP}$  (the average payoff being discounted). Knowing  $G_{LP}$  and  $G_{HP}$ ,  
601 it is easy to show that it is never possible that  $\delta G_{LP} \geq a + b - \delta G_{HP}$  as long as  
602  $\delta < 1$ . In other words, at the evolutionary equilibrium, it is impossible that all LP  
603 individuals refuse to offer  $\delta G_{HP}$  to HP individuals, because they would gain more  
604 from doing so.

605 What if there was some polymorphism in the population such that only *some* LP  
606 individuals refuse to give HP individuals what they ask for? The average social  
607 payoff of those LP individuals is still written the same as in equation (3). But  
608 because we know that at the evolutionary equilibrium all individuals with the same  
609 productivity must gain the same payoff, the payoff of all LP individuals will be the  
610 same, regardless of phenotype. The coexistence of two types of LP individuals in the  
611 population would imply that  $\delta G_{LP} = a + a - \delta G_{HP}$  (the payoff of the two types of  
612 LP individuals in the position of partner when paired with HP individuals is equal),  
613 but as we showed above, this is not possible as long as  $\delta < 1$ . As a consequence, it is  
614 not only impossible that *all* LP individuals refuse to give HP individuals what they  
615 want at the evolutionary equilibrium, it is also impossible that *some* LP individuals  
616 refuse to give HP individuals what they want as long as  $\delta < 1$ .

617 Following the same reasoning, it can be shown that it is not possible for some individ-  
618 uals (of any productivity) to refuse to give their social partner (of any productivity)  
619 what they ask for at the evolutionary equilibrium as long as  $\frac{a}{b} > \frac{\delta(x-1)}{\delta x-2}$  (see SM  
620 section B.2). When  $\frac{a}{b} \leq \frac{\delta(x-1)}{\delta x-2}$ , it is possible that LP individuals refuse to give other  
621 LP individuals what they ask for. This condition reflects the fact that if the differ-  
622 ence of productivity between HP and LP individuals is too large, it is more beneficial  
623 for LP individuals to interact with HP individuals than with LP individuals. As we

624 will see though, this is only possible when partner choice is costly. Moreover, as long  
 625 as  $\frac{a}{b} > 0.5$ , as is the case in our simulations, it is not worth it for LP individuals  
 626 to refuse to interact with other LP individuals, and so all partners will give their  
 627 decision makers what they want at the evolutionary equilibrium.

628 If  $\frac{a}{b} > \frac{\delta(x-1)}{\delta x-2}$ , we can thus write:

$$\left\{ \begin{array}{l} r_{HPHP} = \delta G_{HP} \\ r_{HP LP} = \delta G_{LP} \\ r_{LP LP} = \delta G_{LP} \\ r_{LP HP} = \delta G_{HP} \end{array} \right. \quad (5)$$

629 and if  $\frac{a}{b} \leq \frac{\delta(x-1)}{\delta x-2}$ , we can thus write:

$$\left\{ \begin{array}{l} r_{HPHP} = \delta G_{HP} \\ r_{HP LP} = \delta G_{LP} \\ r_{LP HP} = \delta G_{HP} \end{array} \right. \quad (6)$$

630 4.  $\frac{a}{b} > \frac{\delta(x-1)}{\delta x-2}$ , **no offer is never refused**

631 If  $\frac{a}{b} > \frac{\delta(x-1)}{\delta x-2}$ , from step 3. it directly results that no reward is ever rejected at  
 632 the evolutionary equilibrium, because each partner's reward is exactly equal to the  
 633 decision maker's MAR, and thus each reward is accepted. If no reward is ever refused,  
 634 the average payoff of LP and HP individuals respectively can be written as:

$$\left\{ \begin{array}{l} G_{LP} = (1-x) \left( \frac{1}{2} (-\delta G_{HP} + b + a) + \frac{\delta G_{LP}}{2} \right) + \frac{1}{2} x (a + a) \\ G_{HP} = x \left( \frac{\delta G_{HP}}{2} + \frac{1}{2} (-\delta G_{LP} + b + a) \right) + \frac{1}{2} (1-x) (b + b) \end{array} \right. \quad (7)$$

635 Solving this system gives us an expression for  $G_{HP}$  and  $G_{LP}$  as a function of  $x$  and  
 636  $\delta$  at the evolutionary equilibrium:

$$\begin{cases} G_{LP} = \frac{b(\delta - \delta x + x - 1) + a((\delta - 1)x - 1)}{\delta - 2} \\ G_{HP} = \frac{b(\delta - \delta x + x - 2) + (\delta - 1)xa}{\delta - 2} \end{cases} \quad (8)$$

637 From (5) and (8), it is straightforward to show that when  $\delta$  tends toward 1 (partner  
 638 choice is not costly),  $r_{LPHP}$  tends toward  $b$ . That is, when partner choice is not  
 639 costly, even if LP individuals are in the strategically dominant position of partner,  
 640 at the evolutionary equilibrium they offer HP individuals an amount that is exactly  
 641 equal to their productivity  $b$ . In percentage, this corresponds to an offer proportional  
 642 to the relative contribution of each individual: LP individuals offer HP individuals  
 643  $\frac{b}{b+a} * 100$  % of the total resource to be shared.

644 Similarly, it can be shown that when  $\delta$  tends toward 1, LP individuals offer other LP  
 645 individuals  $a$  resources, HP individuals offer other HP individuals  $b$  resources, and  
 646 HP individuals offer LP individuals  $a$  resources. At the equilibrium, when partner  
 647 choice is not costly each individual is rewarded with an amount exactly equal to his  
 648 contribution.

649 5.  $\frac{a}{b} \leq \frac{\delta(x-1)}{\delta x - 2}$ , **all LP individuals refuse to interact with other LP individuals**

650 In this case, the average payoff of LP and HP individuals respectively can be written  
 651 as:

$$\begin{cases} G_{LP} = (1 - x) \left( \frac{1}{2} (-\delta G_{HP} + b + a) + \frac{\delta G_{LP}}{2} \right) + \delta x G_{LP} \\ G_{HP} = x \left( \frac{\delta G_{HP}}{2} + \frac{1}{2} (-\delta G_{LP} + b + a) \right) + \frac{1}{2} (1 - x) (b + b) \end{cases} \quad (9)$$

652 Solving this system gives us an expression for  $G_{HP}$  and  $G_{LP}$  as a function of  $x$  and  $\delta$   
 653 at the evolutionary equilibrium:

$$\left\{ \begin{array}{l} G_{LP} = \frac{(x-1)((\delta-1)b+a(\delta x-1))}{\delta(x(\delta x-2)-1)+2} \\ G_{HP} = \frac{b(\delta((x-1)x-1)-x+2)-(\delta-1)xa}{\delta(x(\delta x-2)-1)+2} \end{array} \right. \quad (10)$$

654 From (6) and (10), it is straightforward to show that when  $\delta$  tends toward 1, the  
655 previous results hold: LP individuals offer HP individuals  $b$  resources, HP individuals offer  
656 other HP individuals  $b$  resources, and HP individuals offer LP individuals  $a$  resources.

## 657 **B.2 Verification that partners are always better off giving** 658 **their decision maker what they want at the evolutionary equi-** 659 **librium, except when $\frac{a}{b} \leq \frac{\delta(x-1)}{\delta x-2}$**

660 There are four hypothetical primary situations that need to be taken into account:

- 661 • A: when HP individuals are partners, they refuse to give other HP individuals what  
662 they want
- 663 • B: when HP individuals are partners, they refuse to give other LP individuals what  
664 they want
- 665 • C: when LP individuals are partners, they refuse to give other LP individuals what  
666 they want
- 667 • D: when LP individuals are partners, they refuse to give HP individuals what they  
668 want

669 These situations are not mutually exclusive, however, so the total number of possible  
670 situations is:

$$671 \sum_{k=1}^4 \binom{4}{k} = 15$$

672 Situation D was already proven to be impossible at the evolutionary equilibrium in  
673 the previous section. We now show that the same holds for the 14 remaining situations,

674 except in situation C. We give the expected social payoff of HP and LP individuals in  
 675 each situation. We also give the condition that must be satisfied for each situation to be  
 676 possible at the evolutionary equilibrium; it is then straightforward to show that, given our  
 677 parameter values ( $0 \leq x \leq 1$ ,  $0 \leq \delta < 1$ ), this condition can never be satisfied.

678 Situation A:

679 •  $G_{LP} = (1 - x) \left( \frac{1}{2} (-\delta G_{HP} + b + a) + \frac{\delta G_{LP}}{2} \right) + \frac{1}{2} x (a + a)$

680 •  $G_{HP} = x \left( \frac{\delta G_{HP}}{2} + \frac{1}{2} (-\delta G_{LP} + b + a) \right) + \delta (1 - x) G_{HP}$

681 • Condition  $-\delta G_{HP} + b + b \leq \delta G_{HP}$  impossible

682 Situation C:

683 •  $G_{LP} = (1 - x) \left( \frac{1}{2} (-\delta G_{HP} + b + a) + \frac{\delta G_{LP}}{2} \right) + \delta x G_{LP}$

684 •  $G_{HP} = x \left( \frac{\delta G_{HP}}{2} + \frac{1}{2} (-\delta G_{LP} + b + a) \right) + \frac{1}{2} (1 - x) (b + b)$

685 • Condition  $-\delta G_{LP} + a + a \leq \delta G_{LP}$  impossible when  $a > \frac{\delta(x-1)b}{\delta x - 2}$

686 Situation B:

687 •  $G_{LP} = (1 - x) \left( \frac{1}{2} (-\delta G_{HP} + b + a) + \frac{\delta G_{LP}}{2} \right) + \frac{1}{2} x (a + a)$

688 •  $G_{HP} = x \left( \frac{\delta G_{HP}}{2} + \frac{\delta G_{HP}}{2} \right) + \frac{1}{2} (1 - x) (b + b)$

689 • Condition  $-\delta G_{LP} + b + a \leq \delta G_{HP}$  impossible

690 Situation A & C:

691 •  $G_{LP} = (1 - x) \left( \frac{1}{2} (-\delta G_{HP} + b + a) + \frac{\delta G_{LP}}{2} \right) + \delta x G_{LP}$

692 •  $G_{HP} = x \left( \frac{\delta G_{HP}}{2} + \frac{1}{2} (-\delta G_{LP} + b + a) \right) + \delta (1 - x) G_{HP}$

693 • Condition  $-\delta G_{LP} + a + a \leq \delta G_{LP} \wedge -\delta G_{HP} + b + b \leq \delta G_{HP}$  impossible

694 Situation B & C:

695 •  $G_{LP} = (1 - x) \left( \frac{1}{2} (-\delta G_{HP} + b + a) + \frac{\delta G_{LP}}{2} \right) + \delta x G_{LP}$

696 •  $G_{HP} = x \left( \frac{\delta G_{HP}}{2} + \frac{\delta G_{HP}}{2} \right) + \frac{1}{2} (1 - x) (b + b)$

697 • Condition  $-\delta G_{LP} + a + a \leq \delta G_{LP} \wedge -\delta G_{LP} + b + a \leq \delta G_{HP}$  impossible

698 Situation C & D:

699 •  $G_{LP} = \delta x G_{LP} + (1 - x) \left( \frac{\delta G_{LP}}{2} + \frac{\delta G_{LP}}{2} \right)$

700 •  $G_{HP} = x \left( \frac{\delta G_{HP}}{2} + \frac{1}{2} (-\delta G_{LP} + b + a) \right) + \frac{1}{2} (1 - x) (b + b)$

701 • Condition  $-\delta G_{LP} + a + a \leq \delta G_{LP} \wedge -\delta G_{HP} + b + a \leq \delta G_{LP}$  impossible

702 Situation B & D:

703 •  $G_{LP} = (1 - x) \left( \frac{\delta G_{LP}}{2} + \frac{\delta G_{LP}}{2} \right) + \frac{1}{2} x (a + a)$

704 •  $G_{HP} = x \left( \frac{\delta G_{HP}}{2} + \frac{\delta G_{HP}}{2} \right) + \frac{1}{2} (1 - x) (b + b)$

705 • Condition  $-\delta G_{HP} + b + a \leq \delta G_{LP} \wedge -\delta G_{LP} + b + a \leq \delta G_{HP}$  impossible

706 Situation A & D:

707 •  $G_{LP} = (1 - x) \left( \frac{\delta G_{LP}}{2} + \frac{\delta G_{LP}}{2} \right) + \frac{1}{2} x (a + a)$

708 •  $G_{HP} = x \left( \frac{\delta G_{HP}}{2} + \frac{1}{2} (-\delta G_{LP} + b + a) \right) + \delta (1 - x) G_{HP}$

709 • Condition  $-\delta G_{HP} + b + a \leq \delta G_{LP} \wedge -\delta G_{HP} + b + b \leq \delta G_{HP}$  impossible

710 Situation A & B:

711 •  $G_{LP} = (1 - x) \left( \frac{1}{2} (-\delta G_{HP} + b + a) + \frac{\delta G_{LP}}{2} \right) + \frac{1}{2} x (a + a)$

712 •  $G_{HP} = \delta (1 - x) G_{HP} + x \left( \frac{\delta G_{HP}}{2} + \frac{\delta G_{HP}}{2} \right)$

713 • Condition  $-\delta G_{HP} + b + b \leq \delta G_{HP} \wedge -\delta G_{LP} + b + a \leq \delta G_{HP}$  impossible

714 Situation A & C & D:

715 •  $G_{LP} = \delta x G_{LP} + (1 - x) \left( \frac{\delta G_{LP}}{2} + \frac{\delta G_{LP}}{2} \right)$

716 •  $G_{HP} = x \left( \frac{\delta G_{HP}}{2} + \frac{1}{2} (-\delta G_{LP} + b + a) \right) + \delta (1 - x) G_{HP}$

717 • Condition  $-\delta G_{LP} + a + a \leq \delta G_{LP} \wedge -\delta G_{HP} + b + b \leq \delta G_{HP} \wedge -\delta G_{HP} + b + a \leq \delta G_{LP}$

718 impossible



719 Situation A & B & C:

720 •  $G_{LP} = (1 - x) \left( \frac{1}{2} (-\delta G_{HP} + b + a) + \frac{\delta G_{LP}}{2} \right) + \delta x G_{LP}$

721 •  $G_{HP} = \delta(1 - x)G_{HP} + x \left( \frac{\delta G_{HP}}{2} + \frac{\delta G_{HP}}{2} \right)$

722 • Condition  $-\delta G_{LP} + a + a \leq \delta G_{LP} \wedge -\delta G_{HP} + b + b \leq \delta G_{HP} \wedge -\delta G_{LP} + b + a \leq \delta G_{HP}$   
 723 impossible

724 Situation B & C & D:

725 •  $G_{LP} = \delta x G_{LP} + (1 - x) \left( \frac{\delta G_{LP}}{2} + \frac{\delta G_{LP}}{2} \right)$

726 •  $G_{HP} = x \left( \frac{\delta G_{HP}}{2} + \frac{\delta G_{HP}}{2} \right) + \frac{1}{2}(1 - x)(b + b)$

727 • Condition  $-\delta G_{LP} + a + a \leq \delta G_{LP} \wedge -\delta G_{HP} + b + a \leq \delta G_{LP} \wedge -\delta G_{LP} + b + a \leq \delta G_{HP}$   
 728 impossible

729 Situation A & B & D:

730 •  $G_{LP} = (1 - x) \left( \frac{\delta G_{LP}}{2} + \frac{\delta G_{LP}}{2} \right) + \frac{1}{2}x(a + a)$

731 •  $G_{HP} = \delta(1 - x)G_{HP} + x \left( \frac{\delta G_{HP}}{2} + \frac{\delta G_{HP}}{2} \right)$

732 • Condition  $-\delta G_{HP} + b + b \leq \delta G_{HP} \wedge -\delta G_{LP} + b + a \leq \delta G_{HP} \wedge -\delta G_{HP} + b + a \leq \delta G_{LP}$   
 733 impossible

734 Situation A & B & C & D:

735 •  $G_{LP} = \delta(1 - x)G_{LP} + \delta x G_{LP}$

736 •  $G_{HP} = \delta(1 - x)G_{HP} + \delta x G_{HP}$

737 • Condition  $-\delta G_{HP} + b + b \leq \delta G_{HP} \wedge -\delta G_{LP} + b + a \leq \delta G_{HP} \wedge -\delta G_{LP} + a + a \leq$   
 738  $\delta G_{LP} \wedge -\delta G_{HP} + b + a \leq \delta G_{LP}$  impossible

739 As explained in the previous section, the verification that it is not possible for *some* (but  
 740 not all) individuals not to interact with other individuals at the evolutionary equilibrium  
 741 (in case of polymorphism) is already implied by the use of not strict inequalities.

## 742 C Supplementary discussion

### 743 C.1 Opportunity costs

744 In the main article, we explain that when high-productivity individuals are assessing a low-  
745 productivity individual's reward, they have opportunity costs (or "outside options") of 2  
746 because they expect to receive 2 with other high-productivity individuals *on average*. It is  
747 important to see that this is true only because high-productivity individuals have an equal  
748 chance of playing the role of either decision-maker or partner when they interact with other  
749 high-productivity individuals. If some high-productivity individuals always played the role  
750 of decision maker with other high-productivity individuals, they would be exploited all  
751 the time by those high-productivity partners, which would drastically reduce their outside  
752 options when bargaining with low-productivity individuals, preventing the evolution of  
753 proportionality. Thus, in our model the evolution of proportionality depends as much  
754 on the possibility of changing *roles* as on the possibility of changing *partners*. In real  
755 life, this is the equivalent of having a rich and varied social life with multiple cooperative  
756 opportunities in which one is not always in the worse bargaining position (Wiessner, 1996;  
757 Kaplan et al., 2009).

### 758 C.2 Theoretical problems with partner choice

759 Partner choice is an intrinsically complicated subject. The existence of a wide variety  
760 of cooperative partners to choose from means that a wide variety of social strategies can  
761 coexist and provide the same benefits, complicating evolutionary analysis. For example,  
762 an individual's acceptance of low rewards as a decision maker could be compensated by the  
763 low rewards she herself makes as a partner. Or some low payoffs received when interacting  
764 with low-productivity individuals could be compensated by high payoffs received when  
765 interacting with high-productivity individuals.

766           These effects explain why a quick look at the evolved strategies of individuals is not  
767 always enough to find a pattern of proportionality. This is especially true with neural  
768 networks working on a continuum of productivities or effort. While, as we have shown,  
769 the theoretical fitness-maximizing behavior is to offer an amount proportional to one's  
770 own relative contribution, it is not necessarily the case that neural networks will produce  
771 proportional offers for the *whole* range of inputs they are exposed to. Imagine an individual  
772 who offers proportional rewards only to the best producers in the population, while offering  
773 less-than-proportional rewards to other individuals. At the evolutionary equilibrium, our  
774 model predicts that these unfair rewards will be rejected. But as long as finding a new  
775 partner is not costly, being rejected does not lead to a loss of fitness. As a consequence,  
776 any individual can offer less-than-proportional rewards to a fraction of the population, as  
777 long as another fraction still accepts the rewards she makes that are proportional. In other  
778 words, individuals can specialize in offering proportional rewards to only a fraction of the  
779 range of productivities in the population, and stop interacting with the remaining fraction.  
780 Because they stop interacting, the rewards offered to this fraction become subject to drift.

781           Because of this mechanism, it is possible that averaging the output of different evolved  
782 neural networks does not reveal a pattern of proportionality. In our simulations, averaging  
783 the output of 15,000 neural networks producing MARs yielded an almost perfect propor-  
784 tional relationship between contributions and MARs (main paper, Fig. 3C). Plotting the  
785 average output of 15,000 neural networks producing *rewards* did not show such a perfectly  
786 proportional relationship, although it was not far from it. Here, it is important to remem-  
787 ber that despite this variability in the rewards that are extended, proportionality prevails  
788 when we look only at the interactions that *actually take place*: only proportional rewards  
789 are accepted at the evolutionary equilibrium, as evidenced in Fig. 3B of the main article.

790           Finally, problems of neutrality add complexity to the analysis. Although at the begin-  
791 ning of our simulations raising MARs drove the evolution of proportional rewards, once

792 proportional rewards had spread in the population, the selection pressure to maintain high  
793 MARs disappeared: if all individuals offer rewards of  $r$ , requesting  $r$  or  $r - \epsilon$  as a decision  
794 maker brings the same payoff. Because of drift, MARs can thus start to decrease, and  
795 in turn partners will be selected to decrease their rewards to try to exploit those unde-  
796 manding decision makers. This exploitation cannot last for long, as it soon revives the  
797 selection pressure to increase MARs, but the dynamic exists. Although it is rather easy to  
798 conceptualize why, under appropriate conditions, partner choice leads to proportionality,  
799 the actual dynamics underlying this result are far from straightforward to understand.

## 800 References

- 801 Adams, J. S., 1963. Toward an Understanding of Inequity. *Journal of abnormal psychology*  
802 67:422–436.
- 803 Adams, J. S. and P. R. Jacobsen, 1964. Effects of Wage Inequities on Work Quality.  
804 *Journal of abnormal psychology* 69:19–25.
- 805 Aktipis, C. A., 2004. Know when to walk away: contingent movement and the evolution  
806 of cooperation. *Journal of theoretical biology* 231:249–60.
- 807 Aktipis, C. A., 2011. Is cooperation viable in mobile organisms? Simple Walk Away  
808 rule favors the evolution of cooperation in groups. *Evolution and Human Behavior*  
809 32:263–276.
- 810 Alvard, M. S., 2002. Carcass ownership and meat distribution by big-game cooperative  
811 hunters, vol. 21.
- 812 Amici, F., E. Visalberghi, and J. Call, 2014. Lack of prosociality in great apes , capuchin  
813 monkeys and spider monkeys : convergent evidence from two different food distribution  
814 tasks. *Proc. R. Soc.B* .

- 815 André, J.-B. and N. Baumard, 2011. Social opportunities and the evolution of fairness.  
816 Journal of theoretical biology 289:128–35.
- 817 Aristotle, 1999. *Nicomachean Ethics*, vol. 112.
- 818 Austin, W. and E. Walster, 1974. Reactions to confirmations and disconfirmations of  
819 expectancies of equity and inequity.
- 820 Barclay, P., 2004. Trustworthiness and competitive altruism can also solve the “tragedy of  
821 the commons”. *Evolution and Human Behavior* 25:209–220.
- 822 Barclay, P., 2006. Reputational benefits for altruistic punishment. *Evolution and Human*  
823 *Behavior* 27:325–344.
- 824 Barclay, P., 2011. Competitive helping increases with the size of biological markets and  
825 invades defection. *Journal of theoretical biology* 281:47–55.
- 826 Barclay, P., 2013. Strategies for cooperation in biological markets, especially for humans.  
827 *Evolution and Human Behavior* .
- 828 Barclay, P. and B. Stoller, 2014. Local competition sparks concerns for fairness in the  
829 ultimatum game. *Biology letters* 10:1–4.
- 830 Barclay, P. and R. Willer, 2007. Partner choice creates competitive altruism in humans.  
831 *Proceedings. Biological sciences / The Royal Society* 274:749–53.
- 832 Barkow, J. H., L. Cosmides, and J. Tooby, 1992. *The adapted mind: evolutionary psy-*  
833 *chology and the generation of culture*. Oxford University Press.
- 834 Baumard, N., J. André, and D. Sperber, 2013. A mutualistic approach to morality: The  
835 evolution of fairness by partner choice. *Behavioral and Brain Sciences* 6:59–122.
- 836 Baumard, N. and P. Boyer, 2013. Explaining moral religions. *Trends in cognitive sciences*  
837 17:272–80.

- 838 Baumard, N., O. Mascaro, and C. Chevallier, 2012. Preschoolers are able to take merit  
839 into account when distributing goods. *Developmental psychology* 48:492–498.
- 840 Binmore, K., 2005. *Natural Justice*. Oxford University Press.
- 841 Bird, R. B. and E. a. Power, 2015. Prosocial signaling and cooperation among Martu  
842 hunters. *Evolution and Human Behavior* .
- 843 Bräuer, J. and D. Hanus, 2012. Fairness in Non-human Primates? *Social Justice Research*  
844 25:256–276.
- 845 Camerer, C., 2003. *Behavioral game theory: Experiments in strategic interaction*, vol. 32.  
846 Princeton University Press, Princeton, New Jersey.
- 847 Cappelen, A., A. Hole, E. Sørensen, and B. Tungodden, 2007. The pluralism of fairness  
848 ideals: An experimental approach. *American Economic Review* 97:818–827.
- 849 Cappelen, A., E. Sørensen, and B. Tungodden, 2010. Responsibility for what? Fairness  
850 and individual responsibility. *European Economic Review* 54:429–441.
- 851 Cohen, G., 2009. *Why not socialism?* Princeton University Press.
- 852 Dawes, C. T., J. H. Fowler, T. Johnson, R. Mcelreath, and O. Smirnov, 2007. Egalitarian  
853 motives in humans. *Nature* 446:794–796.
- 854 Debove, S., J.-b. Andre, and N. Baumard, 2015a. Partner choice creates fairness in humans.  
855 *Proc. R. Soc.B* 282.
- 856 Debove, S., N. Baumard, and J.-B. André, 2015b. Evolution of equal division among  
857 unequal partners. *Evolution* 69:561–569.
- 858 Fehr, E. and K. Schmidt, 1999. A theory of fairness, competition, and cooperation. *The*  
859 *quarterly journal of economics* 114:817–868.

- 860 Fiske, A. P., 1992. The four elementary forms of sociality: framework for a unified theory  
861 of social relations. *Psychological review* 99:689–723.
- 862 Forber, P. and R. Smead, 2014. The evolution of fairness through spite. *Proceedings of*  
863 *the Royal Society B* 281.
- 864 Frohlich, N., J. Oppenheimer, and A. Kurki, 2004. Modeling other-regarding preferences  
865 and an experimental test. *Public Choice* 119:91–117.
- 866 Gale, J., K. Binmore, and L. Samuelson, 1995. Learning to be imperfect: The ultimatum  
867 game. *Games and Economic Behavior* 8:56–90.
- 868 Gavrillets, S. and S. M. Scheiner, 1993. The genetics of phenotypic of reaction norm shape  
869 V . Evolution of reaction norm shape. *Journal of evolutionary biology* 48:31–48.
- 870 Geraci, A. and L. Surian, 2011. The developmental roots of fairness: Infants' reactions to  
871 equal and unequal distributions of resources. *Developmental Science* 14:1012–1020.
- 872 Gurven, M., 2004. To give and to give not: The behavioral ecology of human food transfers.  
873 *Behavioral and Brain Sciences* 27:543–583.
- 874 Güth, W., R. Schmittberger, and B. Schwarze, 1982. An experimental analysis of ultima-  
875 tum bargaining. *Journal of Economic Behavior & Organization* 3:367–388.
- 876 Hoebel, E. A., 1954. *The Law of Primitive Man: A Study in Comparative Legal Dynamics*  
877 P. 372.
- 878 Hoel, M., 1987. Bargaining games with a random sequence of who makes the offers.  
879 *Economics Letters* 24:5–9.
- 880 Homans, G. C., 1958. Social Behavior as Exchange. *The american journal of sociology*  
881 63:597–606.
- 882 Huck, S. and J. Oechssler, 1999. The Indirect Evolutionary Approach to Explaining Fair  
883 Allocations. *Games and Economic Behavior* 28:13–24.

- 884 Kanngiesser, P., N. Gjersoe, and B. M. Hood, 2010. The effect of creative labor on  
885 property-ownership transfer by preschool children and adults. *Psychological science*  
886 21:1236–41.
- 887 Kaplan, H. and M. Gurven, 2005. The Natural History of Human Food Sharing and  
888 Cooperation : A Review and a New Multi-Individual Approach to the Negotiation of  
889 Norms. Pp. 75–113, *in* R. B. & E. F. H. Gintis, S. Bowles, ed. *Moral sentiments and*  
890 *material interests: The foundations of cooperation in economic life*. MIT Press.
- 891 Kaplan, H. S., P. L. Hooper, and M. Gurven, 2009. The evolutionary and ecological  
892 roots of human social organization. *Philosophical transactions of the Royal Society B*.  
893 364:3289–99.
- 894 Killingback, T. and E. Studer, 2001. Spatial Ultimatum Games, collaborations and the  
895 evolution of fairness. *Proceedings. Biological sciences / The Royal Society* 268:1797–801.
- 896 Konow, J., 2003. Which is the fairest one of all? A positive analysis of justice theories.  
897 *Journal of economic literature* XLI:1188–1239.
- 898 Liénard, P., C. Chevallier, O. Mascaro, P. Kiura, and N. Baumard, 2013. Early under-  
899 standing of merit in Turkana children. *Journal of Cognition and Culture* 13:57–66.
- 900 Lyle, H. F. and E. a. Smith, 2014. The reputational and social network benefits of proso-  
901 ciality in an Andean community. *Proceedings of the National Academy of Sciences of*  
902 *the United States of America* 111:4820–5.
- 903 Marshall, G., A. Swift, D. Routh, and C. Burgoyne, 1999. What is and what ought to be  
904 popular beliefs about distributive justice in thirteen countries. *European Sociological*  
905 *Review* 15:349–367.
- 906 McNamara, J., Z. Barta, L. Fromhage, and A. Houston, 2008. The coevolution of choosi-  
907 ness and cooperation. *Nature* 451:189–192.



- 908 Mellers, B. a., 1982. Equity judgment: A revision of Aristotelian views. *Journal of*  
909 *Experimental Psychology: General* 111:242–270.
- 910 Nesse, R. M., 2007. Runaway social selection for displays of partner value and altruism.  
911 *Biological Theory* 2.
- 912 Nettle, D., K. Panchanathan, T. S. Rai, and A. P. Fiske, 2011. The Evolution of Giving,  
913 Sharing, and Lotteries. *Current Anthropology* 52:747–756.
- 914 Noë, R. and P. Hammerstein, 1994. Biological markets: supply and demand determine  
915 the effect of partner choice in cooperation, mutualism and mating. *Behavioral ecology*  
916 *and sociobiology* 35:1–11.
- 917 Noë, R., J. V. Hooff, and P. Hammerstein, 2001. *Economics in nature: social dilemmas,*  
918 *mate choice and biological markets.* Cambridge University Press, Cambridge, England.
- 919 Nolfi, S. and D. Floreano, 2000. *Evolutionary robotics: the biology, intelligence, and*  
920 *technology of self-organizing machines.* The MIT Press.
- 921 Nowak, M. a., K. M. Page, and K. Sigmund, 2000. Fairness versus reason in the ultimatum  
922 game. *Science* 289:1773–5.
- 923 Osborne, M. and A. Rubinstein, 1990. *Bargaining and markets.* Academic Press, Inc, San  
924 Diego, California.
- 925 Page, K. M. and M. a. Nowak, 2002. Empathy leads to fairness. *Bulletin of mathematical*  
926 *biology* 64:1101–16.
- 927 Page, K. M., M. a. Nowak, and K. Sigmund, 2000. The spatial ultimatum game. *Proceed-*  
928 *ings. Biological sciences / The Royal Society* 267:2177–82.
- 929 Rand, D. G., C. E. Tarnita, H. Ohtsuki, and M. a. Nowak, 2013. Evolution of fairness  
930 in the one-shot anonymous Ultimatum Game. *Proceedings of the National Academy of*  
931 *Sciences of the United States of America* 110:2581–6.

- 932 Roberts, G., 1998. Competitive altruism: from reciprocity to the handicap principle.  
933 Proceedings of the Royal Society B: Biological Sciences 265:427–431.
- 934 Robinson, P. H. and R. Kurzban, 2007. Concordance and Conflict in Intuitions of Justice.  
935 Minn. L. Rev. 91:1–75.
- 936 Rubinstein, A., 1982. Perfect equilibrium in a bargaining model. *Econometrica: Journal*  
937 *of the Econometric Society* 50:97–110.
- 938 Sahlins, M., 1972. *Stone age economics*. Aldine - Atherton, Inc, Chicago and New York.
- 939 Schäfer, M., D. B. M. Haun, and M. Tomasello, 2015. Fair Is Not Fair Everywhere .
- 940 Schmidt, M. F. H. and J. a. Sommerville, 2011. Fairness expectations and altruistic sharing  
941 in 15-month-old human infants. *PLoS ONE* 6.
- 942 Skitka, L. J., 2012. Cross-Disciplinary Conversations: A Psychological Perspective on  
943 Justice Research with Non-human Animals. *Social Justice Research* 25:327–335.
- 944 Sloane, S., R. Baillargeon, and D. Premack, 2012. Do Infants Have a Sense of Fairness?  
945 *Psychological Science* 23:196–204.
- 946 Sylwester, K. and G. Roberts, 2013. Reputation-based partner choice is an effective alter-  
947 native to indirect reciprocity in solving social dilemmas. *Evolution and Human Behavior*  
948 34:201–206.
- 949 Trivers, R., 1971. The evolution of reciprocal altruism. *Quarterly review of biology* 46:35–  
950 57.
- 951 Trivers, R., 2006. Reciprocal altruism: 30 years later. *in* *Cooperation in Primates and*  
952 *Humans: Mechanisms and Evolution*. Springer.
- 953 Turiel, E., 2002. *The Culture of morality: Social development, context, and conflict*.

954 Walster, E., E. Berscheid, and G. W. Walster, 1973. New Directions in Equity Research.  
955 Advances in Experimental Social Psychology 25:151–176.

956 Wiessner, P., 1996. Leveling the hunter: constraints on the status quest in foraging  
957 societies. Pp. 171–192, *in* Food and the Status Quest: An Interdisciplinary Perspective,  
958 p. wiessne ed. Berghahn Books, Oxford, UK.

## 959 **D Acknowledgments**

960 SD thanks the *Région Ile-de-France* for funding this research through a 2012 DIM "*Prob-*  
961 *lématiques transversales aux systèmes complexes*" grant, and thanks the *Institut des sys-*  
962 *tèmes complexes* and the *Ecole Doctorale Frontières du Vivant (FdV) – Programme Bet-*  
963 *tencourt* for its support. This work was supported by ANR-10-LABX-0087 IEC and ANR-  
964 10-IDEX-0001-02 PSL\*.

## 965 **E Author contributions**

966 SD built the simulations and analytical model, analyzed the data and wrote the manuscript.  
967 J-B.A and NB designed and coordinated the study.

## 968 **F Data availability**

969 The data presented in this paper will be archived online on dryad.com and on the first  
970 author's website.

## 971 **G Competing interests**

972 We have no competing interests to declare.

## H Figures

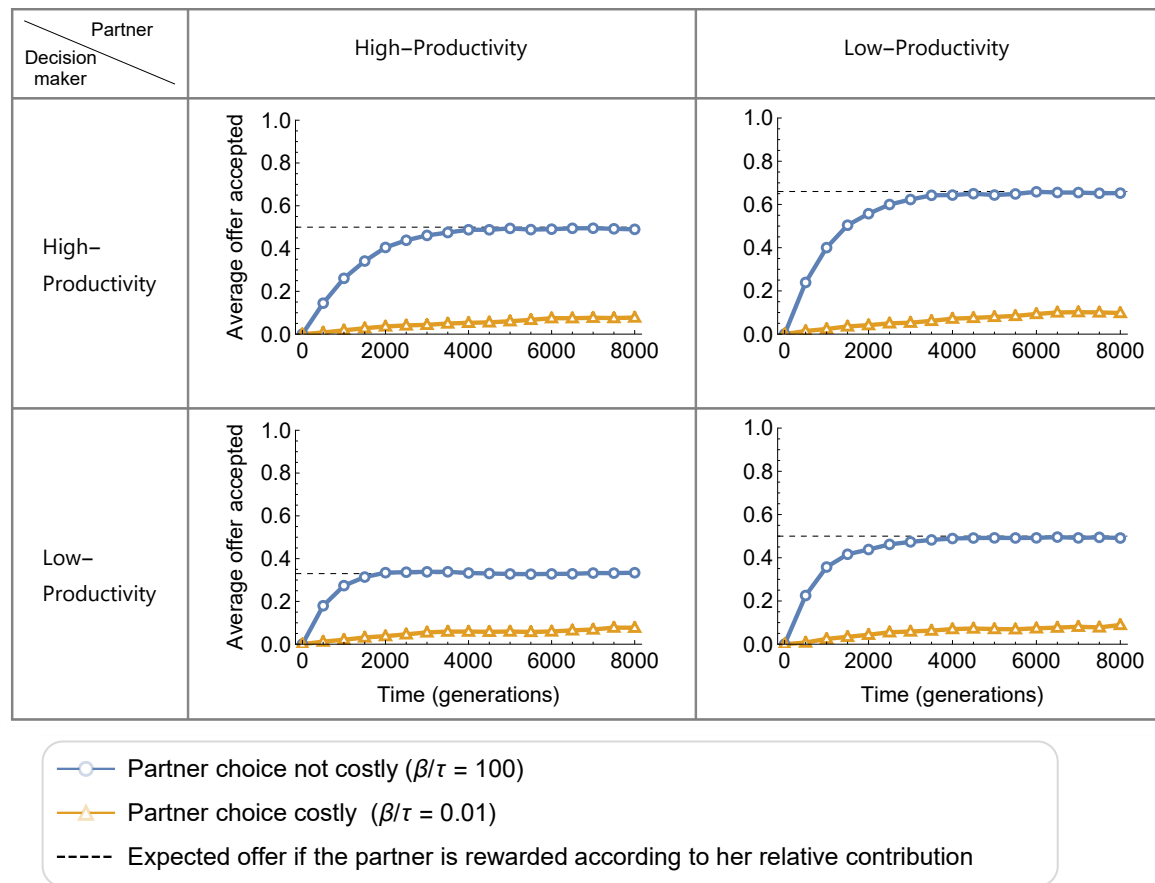

Figure 1: Evolution of the average rewards accepted in cooperative interactions according to the productivity of the decision maker and the partner. High-productivity individuals produce twice as much resources as low-productivity individuals. When partner choice is not costly, rewards evolve to match the decision maker's relative contribution. Dashed lines represent the expected reward in the analytical model. The evolution of MARs is visually undistinguishable from the evolution of rewards and thus not represented.

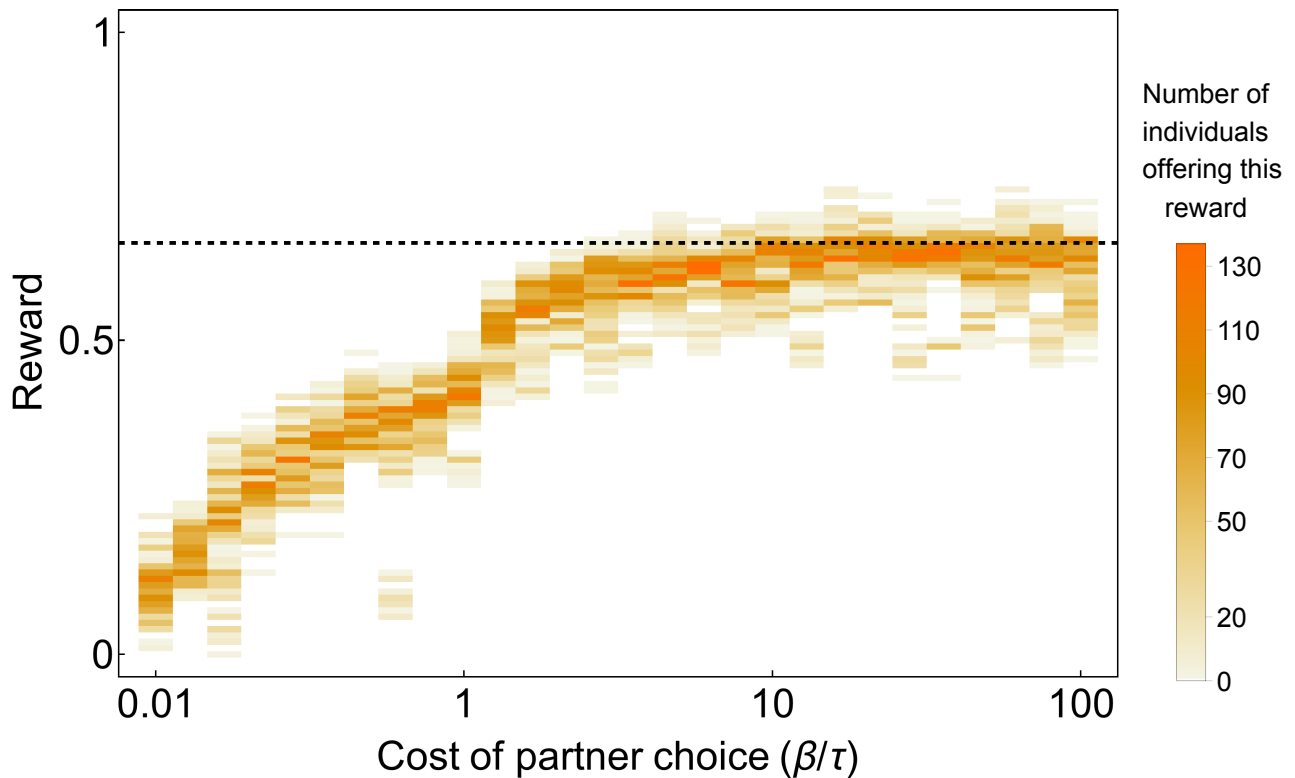

Figure 2: Distribution of rewards offered by low-productivity individuals to high-productivity individuals in the last generation of an 8,000-generation simulation, for different levels of partner choice cost (higher values of  $\frac{\beta}{\tau}$  represent lower costs). High-productivity individuals' relative contribution compared to low-productivity individuals is 0.66, so the dashed line represents the expected equitable distribution. This distribution can only be reached when partner choice is not costly ( $\frac{\beta}{\tau}$  is high).

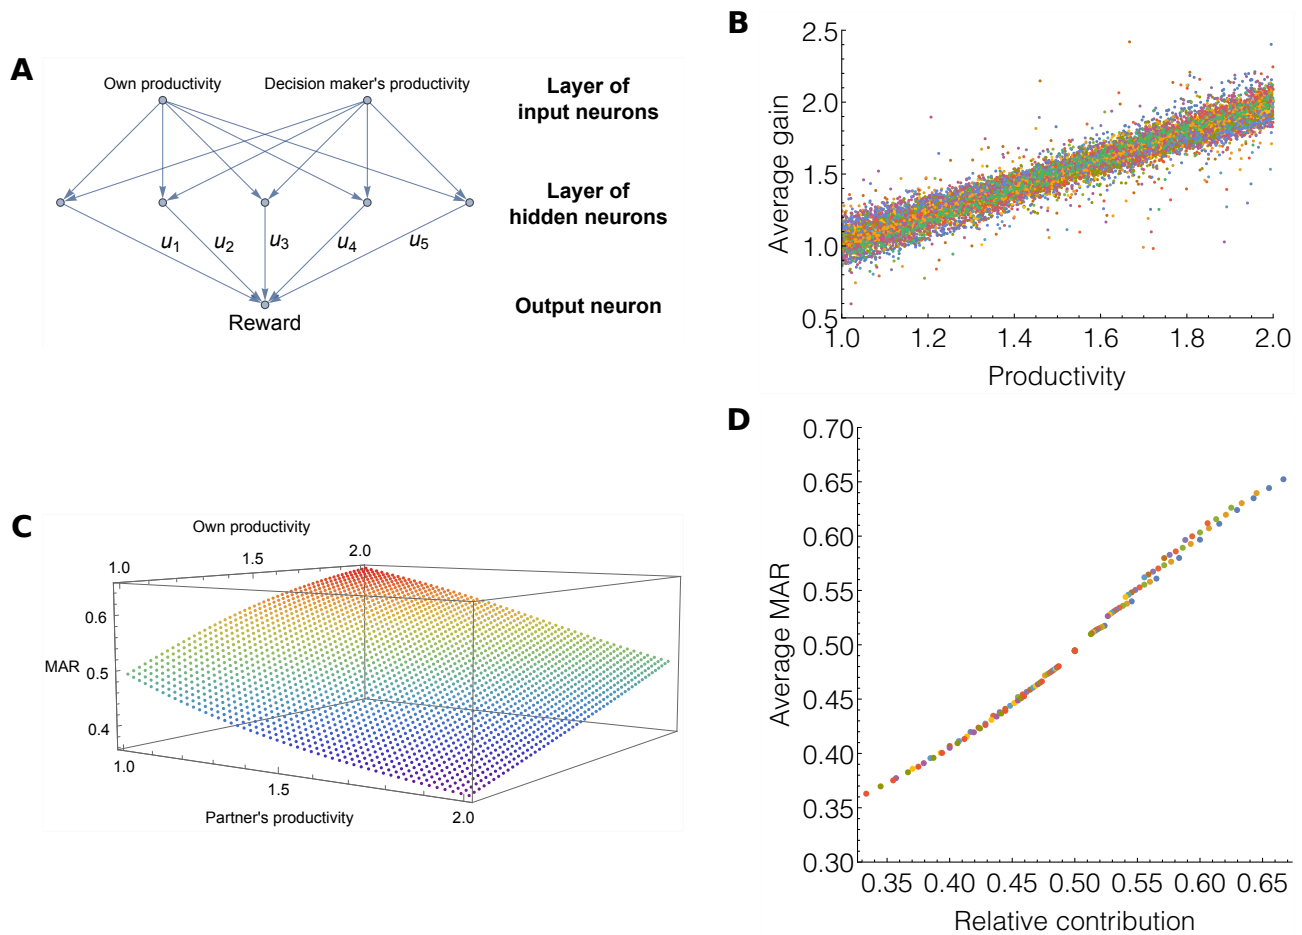

Figure 3: Evolution of equitable rewards made by neural networks working on a continuum of productivities. **A**: Schematic representation of the neural networks that make rewards. Networks take each individual's productivity as inputs and produce the reward as output. The  $u$ 's represent synaptic weights on which evolution takes place. **B**: 15,000 individuals and their lifelong average gain plotted against their productivity. **C**: Average MARs produced by the neural networks of 15,000 individuals after 8,000 generations, for different values of the input neurons. The more an individual produces and the less the partner produces, the larger the individual's MAR. **D**: Average MARs produced by 15,000 neural networks plotted against the relative contribution of the bearer of the network.

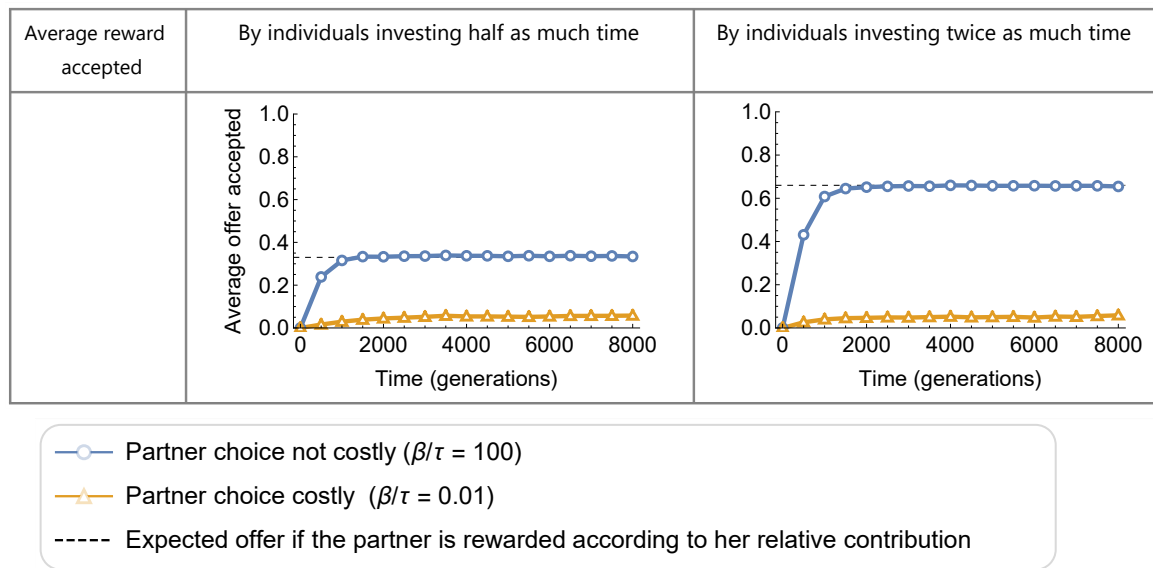

Figure 4: Evolution of the average reward accepted, depending on whether partners invest twice as much or half as much time into cooperation. Individuals investing twice as much time receive twice as much resources at equilibrium, and vice-versa.
